# Supplementary material
Source: PubMed Central journal article supplement (PMC3542401)
Supplement: NIHMS428127-supplement-Supplementary_Figures_1___2.pdf [file NIHMS428127-supplement-Supplementary_Figures_1___2.pdf]

Supplementary online materials:

### VAMP2 cleavage by Botulinum neurotoxin serotype B and Tetanus neurotoxin

Sheng Chen, Andrew P. A. Karalewitz, and Joseph T. Barbieri

Supplementary figures:

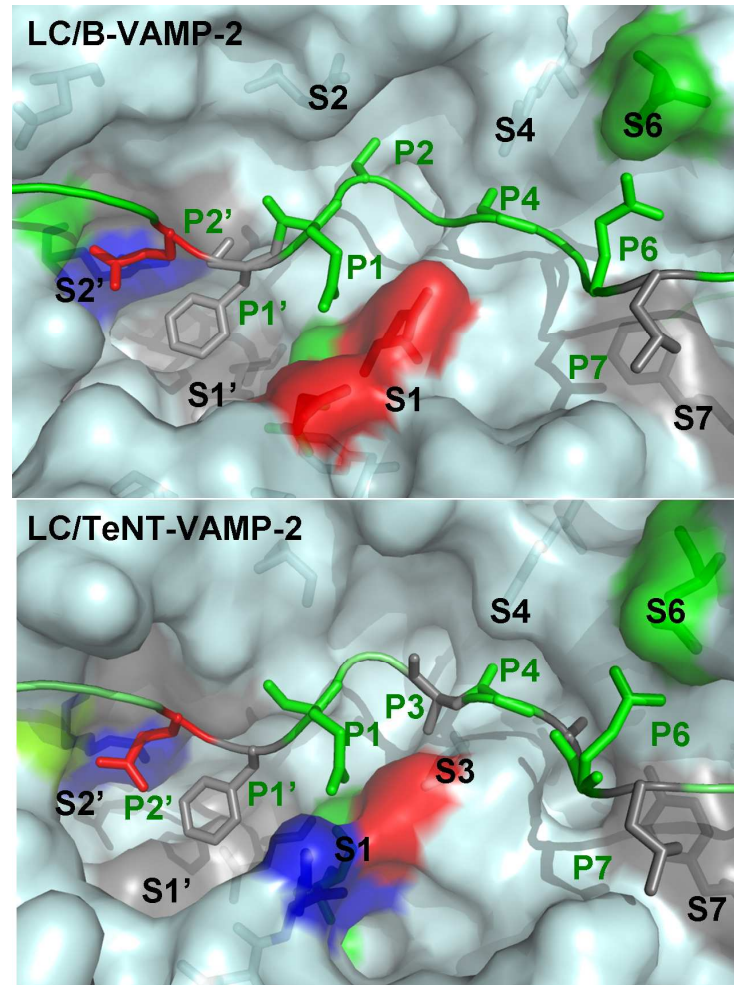

**Supplementary Fig 1. The recognition of VAMP2 P sites residues within the active sites regions of LC/B and LC/T.** (Upper panel) LC/B-VAMP2 recognition at P2', P1', P1, P2, P4, P6 and P7 via the corresponding S pocket residues of LC/B. (Lower panel) LC/T-VAMP2 recognition at P2', P1', P1, P3, P4, P6 and P7 residues of VAMP2 via the corresponding S pocket residues of LC/T.

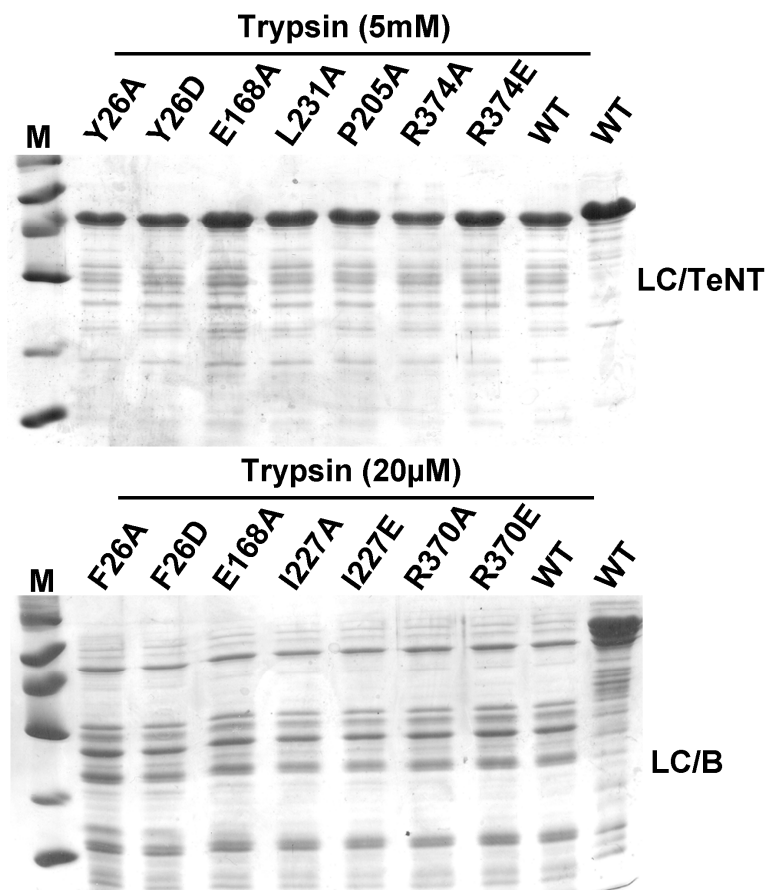

**Supplementary Fig 2. Trypsin digestion profiles of LC/B, LC/T and their derivatives.** Four  $\mu\text{g}$  of LC/B or LC/T and their indicated derivatives were incubated with indicated amount of trypsin for 10 min at  $37^\circ\text{C}$ . Proteins were resolved in 13.5% SDS- PAGE.

**Supplementary method:**

**Trypsin digestion of LC/B, LC/T and their derivatives** LC/B, LC/T or LC derivatives (4 $\mu$ g) were incubated with 20 $\mu$ M- (for LC/B and LC/B derivatives) or 5mM- (for LC/T and LC/T derivatives) trypsin in a 10 $\mu$ l reaction for 10 min at 37°C. The reactions were stopped and resolved in SDS-PAGE gels.
